# Supplementary material
Source: PubMed Central journal article supplement (PMC4512877)
Supplement: NIHMS692587-supplement-Supplemental_Files__PDF_.pdf [file NIHMS692587-supplement-Supplemental_Files__PDF_.pdf]

## **SUPPLEMENTAL MATERIAL**

**Supplemental Table: Baseline Characteristics of Chronic Renal Insufficiency Cohort Participants Included and Not Included in the Study.\***

|                                           | <b>Included<br/>(N=3,093)</b> | <b>Not Included<br/>(N=427)</b> | <b>p</b> |
|-------------------------------------------|-------------------------------|---------------------------------|----------|
| <b>Age (years)</b>                        | 59 (11)                       | 61 (10)                         | 0.003    |
| <b>Female</b>                             | 45%                           | 46%                             | 0.63     |
| <b>Race/Ethnicity</b>                     |                               |                                 | <0.001   |
| <b>White</b>                              | 45%                           | 30%                             |          |
| <b>Black</b>                              | 39%                           | 57%                             |          |
| <b>Hispanic</b>                           | 12%                           | 12%                             |          |
| <b>Other</b>                              | 4%                            | 4%                              |          |
| <b>Diabetes mellitus</b>                  | 46%                           | 73%                             | <0.001   |
| <b>Hypertension</b>                       | 46%                           | 73%                             | <0.001   |
| <b>Current Smoker</b>                     | 12%                           | 13%                             | 0.52     |
| <b>Current Alcohol Use</b>                | 59%                           | 45%                             | <0.001   |
| <b>Cardiovascular Disease</b>             | 28%                           | 68%                             | <0.001   |
| <b>Body Mass Index (kg/m<sup>2</sup>)</b> | 31.8 (7.6)                    | 34.3 (8.5)                      | <0.001   |
| <b>Systolic Blood Pressure (mmHg)</b>     | 126 (21)                      | 132 (24)                        | <0.001   |
| <b>Diastolic Blood Pressure (mmHg)</b>    | 70 (13)                       | 68 (14)                         | 0.004    |
| <b>eGFR (mL/min/1.73m<sup>2</sup>)</b>    | 43.5 (16.9)                   | 34.5 (14.9)                     | <0.001   |
| <b>24-hour Urine Protein (g/24 hrs.)</b>  | 0.9 (1.8)                     | 1.6 (3.1)                       | <0.001   |
| <b>Hemoglobin (g/dL)</b>                  | 12.9 (1.8)                    | 12.2 (1.9)                      | <0.001   |
| <b>Low-density lipoprotein (mg/dL)</b>    | 100 (35)                      | 91 (34)                         | <0.001   |
| <b>High-density lipoprotein (mg/dL)</b>   | 49 (16)                       | 45 (15)                         | <0.001   |
| <b>NT-proBNP (pg/mL)<sup>†</sup></b>      | 124 (55, 299)                 | 510 (221, 1441)                 | <0.001   |
| <b>Troponin T (pg/mL)<sup>†</sup></b>     | 11 (5, 20)                    | 24 (14, 43)                     | <0.001   |

\*Note: Mean (Standard Deviation) reported for continuous variables and percentage for categorical variables. P values are obtained using Kruskal-Wallis tests for continuous variables and Chi-square tests for categorical variables.

<sup>†</sup>Reported as Median (Interquartile Range)

*Abbreviations:* estimated glomerular filtration rate (eGFR);N-terminal pro b-type natriuretic peptide (NT-proBNP)





**THE KANSAS CITY QUESTIONNAIRE:**

---

|                                                |                          |                          |                          |                          |                          |                          |
|------------------------------------------------|--------------------------|--------------------------|--------------------------|--------------------------|--------------------------|--------------------------|
| Visiting family or friends out<br>of your home | <input type="checkbox"/> |
| Intimate relationships with<br>loved ones      | <input type="checkbox"/> |

---

This questionnaire was \_\_\_\_\_ self-administered \_\_\_\_\_ administered by study personnel
